# Supplementary material for: Urinary excretion of organosulfur compounds after acute ingestion of black onion
Source: Royal Society of Chemistry journal article supplement (doi:10.1039/d3fo01099f), 2023-01-01
Supplement: d3fo01099f1.pdf [file d3fo01099f1.pdf]

1 **SUPPLEMENTARY INFORMATION**

2 **Urinary excretion of organosulfur compounds after acute ingestion of black onion**

3 Alicia Moreno-Ortega<sup>1,2\*</sup>, Iziar A. Ludwig<sup>3,‡</sup>, María-José Motilva<sup>3,§</sup>, José Manuel

4 Moreno-Rojas<sup>1,2</sup> and Gema Pereira-Caro<sup>1,2\*</sup>

5

6 <sup>1</sup>Department of Agroindustry and Food Science, Andalusian Institute of Agricultural and  
7 Fisheries Research and Training (IFAPA), Alameda del Obispo, Avda. Menéndez-Pidal,  
8 14004 Córdoba, Spain;

9 <sup>2</sup>Foods for Health Group, Instituto Maimónides de Investigación Biomédica de Córdoba  
10 (IMIBIC), Córdoba, Spain.

11 <sup>3</sup>Food Technology Department, XaRTA-TPV, Agrotecnio Center, Escola Tècnica  
12 Superior d'Enginyeria Agrària, University of Lleida. Avda. Alcalde Rovira Roure 191,  
13 25198 Lleida, Spain

14 <sup>‡</sup> Current address: Departamento de Ciencias de la Alimentación y Fisiología, Facultad  
15 de Farmacia y Nutrición, Universidad de Navarra, 31008 Pamplona, Spain

16 <sup>§</sup> Current address: Instituto de Ciencias de la Vid y del Vino (ICVV), (Consejo Superior  
17 de Investigaciones Científicas-CSIC, Gobierno de La Rioja, UR), Finca “La Grajera”,  
18 Carretera de Burgos km 6, 26007, Logroño, La Rioja, Spain

19 \*Corresponding authors:

20 Dra. Alicia Moreno-Ortega ([alicia.moreno.ortega@juntadeandalucia.es](mailto:alicia.moreno.ortega@juntadeandalucia.es))

21 Dra. Gema Pereira-Caro ([mariag.pereira@juntadeandalucia.es](mailto:mariag.pereira@juntadeandalucia.es))

22 IFAPA-Alameda del Obispo, Department of Food Science and Health, Avenida  
23 Menéndez Pidal, SN, 14071 Córdoba (Spain). Tel. 0034 671 532 734

24

Table S1.- UHPLC-HRMS-based identification of phenolic and organosulfur compounds detected in human urine samples after black onion ingestion

| Peak                                                        | Retention Time (min) | Compound                                                | Chemical Formula [m/z] <sup>-</sup> | Experimental Mass [m/z] <sup>-</sup> | δ (ppm) |
|-------------------------------------------------------------|----------------------|---------------------------------------------------------|-------------------------------------|--------------------------------------|---------|
| <b>γ-Glutamyl-S-alk(en)yl-L-cysteine derivatives (GSak)</b> |                      |                                                         |                                     |                                      |         |
| 1                                                           | 4.3                  | γ-Glutamyl-S-(propyl)-L-cysteine sulfoxide              | C11H21N2O6S                         | 309.1115                             | -2.1191 |
| 2                                                           | 6.3                  | γ-Glutamyl-S-(S-1-propenyl)-L-cysteine-glycine          | C13H22N3O6S2                        | 380.0944                             | 0.8362  |
| 3                                                           | 6.4                  | γ-Glutamyl-S-(2-carboxypropyl)-L-cysteine               | C12H19N2O7S <sup>-2</sup>           | 335.0907                             | -0.0579 |
| 4                                                           | 7.9                  | γ-Glutamyl-S-(S-methyl)-L-cysteine-glycine              | C11H20N3O6S2                        | 354.0788                             | 0.6916  |
| 5                                                           | 7.9                  | γ-Glutamyl-S-methyl-L-cysteine (GSMC)                   | C9H17N2O5S                          | 265.0853                             | 0.1777  |
| 6                                                           | 8.5                  | Glutathione                                             | C10H18N3O6S                         | 308.0911                             | 0.7967  |
| 7                                                           | 8.6                  | γ-Glutamyl-S-allyl-L-cysteine (GSAC)                    | C11H19N2O5S                         | 291.1009                             | 0.4285  |
| 8                                                           | 8.7                  | γ-Glutamyl-L-cysteine                                   | C8H15N2O5S                          | 251.0696                             | -0.9444 |
| 9                                                           | 8.7                  | γ-Glutamyl-S-(1-propenyl)-L-cysteine sulfoxide (GS1PCS) | C11H19N2O6S                         | 307.0958                             | -0.4247 |
| 10                                                          | 9.0                  | γ-Glutamyl-S-allyl-L-cysteine sulfoxide (GSACS)         | C11H19N2O6S                         | 307.0958                             | -1.0128 |
| 11                                                          | 9.6                  | γ-Glutamyl-S-methyl-L-cysteine sulfoxide (GSMCS)        | C9H17N2O6S                          | 281.0801                             | -0.8092 |
| 12                                                          | 9.6                  | γ-Glutamyl-S-(propyl)-L-cysteine                        | C11H21N2O5S                         | 293.1165                             | -0.3883 |
| <b>S-alk(en)yl-L-cysteine derivatives (SAk)</b>             |                      |                                                         |                                     |                                      |         |
| 13                                                          | 1.4                  | S-(2-Propenyl)-allyl-L-cysteine sulfoxide               | C9H16NO3S                           | 218.0845                             | -1.8770 |
| 14                                                          | 4.0                  | S-Butanoyl-L-cysteine sulfoxide (Butiin)                | C7H16NO3S                           | 194.0845                             | -0.8589 |
| 15                                                          | 4.0                  | S-Allyl-L-cysteine (SAC)                                | C6H12NO2S                           | 162.0583                             | -1.0605 |
| 16                                                          | 4.3                  | N-Acetyl-S-(1-propenyl)-L-cysteine sulfoxide (NAS1PCS)  | C8H14NO4S                           | 220.0638                             | -1.2877 |
| 17                                                          | 4.5                  | N-Acetyl-S-(1-propenyl)-L-cysteine (NAS1PC)             | C8H14NO3S                           | 204.0689                             | -1.9576 |
| 18                                                          | 4.9                  | trans-S-(1-Propenyl)-L-cysteine (S1PC)                  | C6H12NO2S                           | 162.0583                             | -0.5898 |
| 19                                                          | 5.6                  | S-Propyl-L-cysteine (Deoxypropiin)                      | C6H14NO2S                           | 164.0740                             | -4.2089 |
| 20                                                          | 6.2                  | S-Allyl-L-cysteine sulfoxide (Alliin)                   | C6H12NO3S                           | 178.0532                             | 1.5374  |
| 21                                                          | 6.7                  | S-(1-Propenyl)-L-cysteine sulfoxide (Isoalliin)         | C6H12NO3S                           | 178.0532                             | 2.5793  |
| 22                                                          | 7.1                  | Cycloalliin                                             | C6H12NO3S                           | 178.0532                             | 2.3222  |
| 23                                                          | 7.1                  | S-(2-Carboxypropyl) cysteine                            | C7H14NO4S                           | 208.0638                             | 1.7404  |

|    |     |                                                                  |              |          |         |
|----|-----|------------------------------------------------------------------|--------------|----------|---------|
| 24 | 7.3 | <i>S</i> -Methyl-L-cysteine sulfoxide (Methiin)                  | C4H10NO3S    | 152.0376 | 3.5869  |
| 25 | 7.6 | Methionine sulfoxide                                             | C5H12NO3S    | 166.0532 | -0.6264 |
| 26 | 7.9 | <i>S</i> -Propyl-L-cysteine sulfoxide (Propiin)                  | C6H14NO3S    | 180.0689 | 2.4960  |
| 27 | 8.1 | <i>S</i> -Carboxymethyl-L-cysteine (Carbocysteine)               | C5H10NO4S    | 180.0325 | 2.5441  |
| 28 | 8.4 | <i>S</i> -(2-Carboxypropyl)-L-cysteine-glycine                   | C9H17N2O5S   | 265.0853 | 0.6382  |
| 29 | 8.6 | <i>S</i> -Ethyl-L-cysteine sulfoxide (Ethiin)                    | C5H12NO3S    | 166.0532 | -0.0752 |
| 30 | 9.6 | <i>N</i> -Acetyl- <i>S</i> -(2-carboxypropyl)-L-cysteine (NACPC) | C9H16NO5S    | 250.0744 | 2.5686  |
| 31 | 9.7 | <i>S</i> -Allylmercaptoglutathione                               | C13H22N3O6S2 | 380.0945 | 0.2443  |

26

27

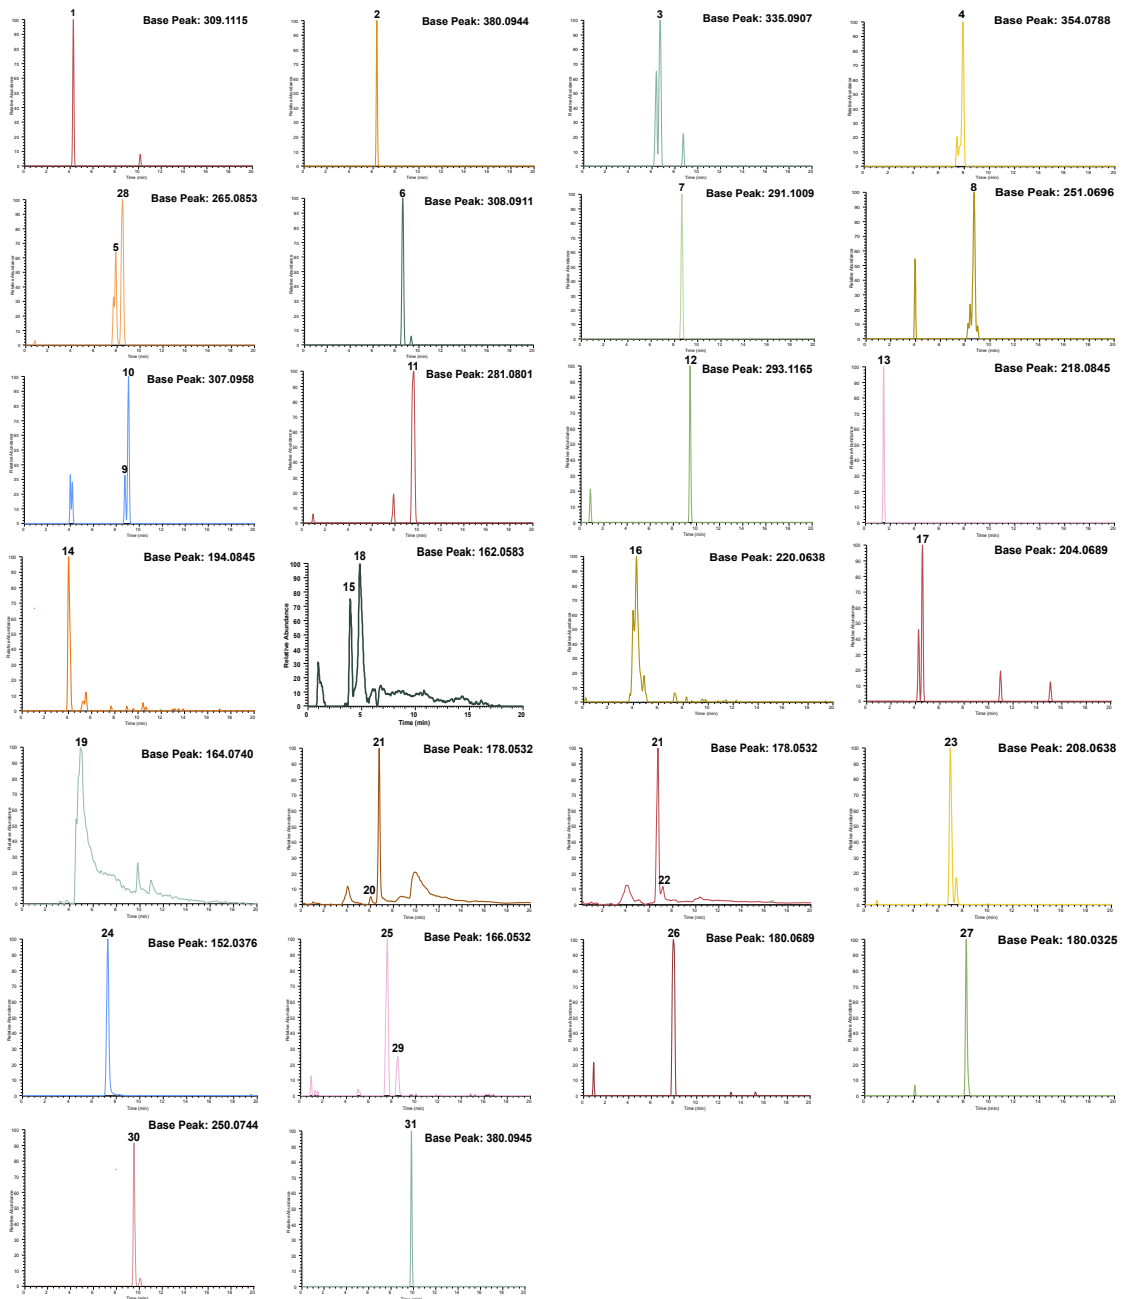

Figure S1. UHPLC-HRMS profiles of OSCs identified in human urine samples after the intake of 20g of black onion.
